# Supplementary material for: Evidence of, and a proposed explanation for, bimodal transport states in alluvial rivers
Source: Copernicus journal article supplement (doi:10.5194/esurf-6-583-2018), 2018-07-25
Supplement: Supplementary file 1 [file esurf-6-583-2018-supplement.zip]

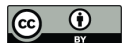

## *Supplement of*

# **Evidence of, and a proposed explanation for, bimodal transport states in alluvial rivers**

**Kieran B. J. Dunne and Douglas J. Jerolmack**

*Correspondence to:* Kieran B. J. Dunne ([kdunne@sas.upenn.edu](mailto:kdunne@sas.upenn.edu))

- [esurf-6-583-2018-supplement-title-page.pdf](#)
- [Global Datasets.csv](#)
- [Laboratory Channels.csv](#)
- [Sacramento River GST.csv](#)
- [Seepage Erosion Channels.csv](#)
- [Supplementary Material.ipynb](#)

The copyright of individual parts of the supplement might differ from the CC BY 4.0 License.
